1 **Calpain-2 mediates SARS-CoV-2 entry and represents a therapeutic target**

2

3 Qiru Zeng<sup>1</sup>, Avan Antia<sup>1</sup>, Maritza Puray-Chavez<sup>1</sup>, Sebla B. Kutluay<sup>1</sup>, Siyuan Ding<sup>1</sup>

4

5 <sup>1</sup>Department of Molecular Microbiology, Washington University School of Medicine, St.  
6 Louis, MO, USA.

7 Corresponding author: Siyuan Ding, [siyuan.ding@wustl.edu](mailto:siyuan.ding@wustl.edu)

8

9 **ABSTRACT**

10 Since the beginning of the coronavirus disease 2019 (COVID-19) pandemic, much effort  
11 has been dedicated to identifying effective antivirals against severe acute respiratory  
12 syndrome coronavirus 2 (SARS-CoV-2). A number of calpain inhibitors show excellent  
13 antiviral activities against SARS-CoV-2 by targeting the viral main protease (M<sup>pro</sup>), which  
14 plays an essential role in processing viral polyproteins. In this study, we found that calpain  
15 inhibitors potently inhibited the infection of a chimeric vesicular stomatitis virus (VSV)  
16 encoding the SARS-CoV-2 spike protein, but not M<sup>pro</sup>. In contrast, calpain inhibitors did  
17 not exhibit antiviral activities towards the wild-type VSV with its native glycoprotein.  
18 Genetic knockout of calpain-2 by CRISPR/Cas9 conferred resistance of the host cells to  
19 the chimeric VSV-SARS-CoV-2 virus and a clinical isolate of wild-type SARS-CoV-2.  
20 Mechanistically, calpain-2 facilitates SARS-CoV-2 spike protein-mediated cell attachment  
21 by positively regulating the cell surface levels of ACE2. These results highlight an M<sup>pro</sup>-  
22 independent pathway targeted by calpain inhibitors for efficient viral inhibition. We also

23 identify calpain-2 as a novel host factor and a potential therapeutic target responsible for  
24 SARS-CoV-2 infection at the entry step.

25

## 26 **INTRODUCTION**

27 High mutation rates of SARS-CoV-2 pose great challenges for antiviral drug development  
28 and treatment of COVID-19 patients. Thus far, most antiviral strategies have directly  
29 targeted key viral factors involved in the SARS-CoV-2 replication cycle [1]. Remdesivir  
30 (Gilead) and molnupiravir (Merck) represent two FDA authorized antiviral drugs that  
31 inhibit the SARS-CoV-2 RNA-dependent RNA polymerase (RdRp) [2]. In addition to RdRp,  
32 the viral main protease ( $M^{\text{pro}}$ ) has been a drug target of great interest due to its  
33 fundamental role in processing the viral polyproteins. In a series of studies,  $M^{\text{pro}}$  inhibitors,  
34 including Paxlovid (Pfizer), boceprevir, GC376, and various calpain inhibitors, were  
35 reported to potently suppress SARS-CoV-2 replication in different cell types and in pre-  
36 clinical animal models [3, 4].

37

38 In a recent study from our group [5], we performed a drug repurposing screen and  
39 identified several compounds that potently block SARS-CoV-2 infection. One such  
40 compound is MG132, a commonly used 26S proteasome inhibitor. MG132 was previously  
41 reported to impair SARS-CoV replication by inhibiting the host cysteine protease m-  
42 calpain, also known as calpain-2 (encoded by *CAPN2*), thus functioning through a  
43 proteasome-independent pathway [6]. Several pieces of evidence led us to hypothesize  
44 that host calpain proteases may be required for SARS-CoV-2 infection. First, MG132  
45 inhibited SARS-CoV-2 replication, while ubiquitin-activating enzyme E1 inhibitor PRY-41

46 and two other proteasome inhibitors bortezomib and lactacystin did not. Second, E-64,  
47 which inhibits endosomal cathepsins, papain, and calpain, inhibited SARS-CoV-2 more  
48 robustly than chloroquine, which only targets cathepsins and not calpain. Third, calpain  
49 inhibitor II and calpeptin suppressed SARS-CoV-2 replication [4, 7], although the  
50 mechanism was postulated to be mediated by interfering with activities of M<sup>pro</sup>.

51

52 Of note, in our follow-up studies described here, we found that MG132 also exhibited  
53 antiviral activities against a chimeric vesicular stomatitis virus (VSV) expressing SARS-  
54 CoV-2 spike protein (VSV-SARS-CoV-2) [8], but not expressing M<sup>pro</sup>. The lack of inhibition  
55 against wild-type (WT) VSV led us to hypothesize that (1) SARS-CoV-2 spike protein may  
56 be an additional viral target of calpain and protease inhibitors; and (2) calpain proteins  
57 themselves may be crucial host factors for SARS-CoV-2 infection. In this paper, we  
58 confirm these hypotheses and identify CAPN2 as a novel pro-viral host factor that aids in  
59 the entry of SARS-CoV-2. We demonstrate that the absence of *CAPN2* reduces viral  
60 binding to host cells and RNA production during early steps of the SARS-CoV-2  
61 replication cycle. The findings provide mechanistic insights into the cellular process of  
62 SARS-CoV-2 entry and offer an additional explanation to the mechanism of action of  
63 calpain inhibitors.

64

## 65 **RESULTS**

### 66 **MG132 preferentially inhibits the infection of VSV-SARS-CoV-2 but not VSV**

67 In a recent antiviral compound screen that we conducted using a recombinant SARS-  
68 CoV-2 mNeonGreen reporter virus [5], multiple compounds efficaciously inhibited viral

69 infection in Vero E6 cells. We validated 18 of the top hits using recombinant VSV eGFP  
70 reporter viruses that either encode the SARS-CoV-2 spike protein or the native VSV-G  
71 [8]. Among the 18 compounds that we tested, most showed a dose-dependent inhibition  
72 of VSV-SARS-CoV-2 and VSV infections in MA104 cells (**Fig. 1**). Nigericin, brefeldin A,  
73 and 3-isobutyl-1-methylxanthine (IBMX) had effective concentration to reach 50%  
74 inhibition ( $EC_{50}$ ) values lower than 2  $\mu$ M against both VSV-SARS-CoV-2 and VSV  
75 infections (**Fig. 1**). Nitazoxanide was recently reported to inhibit SARS-CoV-2 infection [9]  
76 and we observed similar results (**Fig. S1**). In addition, we noticed that MG132, a broad-  
77 spectrum proteasome inhibitor, exhibited a 100-fold selectivity in antiviral activities  
78 against VSV ( $EC_{50}$  of 44.4  $\mu$ M) and VSV-SARS-CoV-2 ( $EC_{50}$  of 0.64  $\mu$ M) (**Fig. 1**). Notably,  
79 neither of the two reporter viruses express  $M^{pro}$  and the only difference lies in the VSV  
80 glycoprotein replaced by the SARS-CoV-2 spike protein. This data, together with the  
81 previous report of MG132 and SARS-CoV, led us to further test the antiviral activities of  
82 MG132 and other calpain inhibitors and their effect on the spike protein.

83

#### 84 **Calpain inhibitors strongly inhibit VSV-SARS-CoV-2 infection**

85 To examine whether MG132 targeting host calpain proteases accounts for the inhibition  
86 observed, we tested a set of commercially available calpain inhibitors, including ALLN  
87 (also known as MG101 or calpain inhibitor I), calpain inhibitor III, calpeptin, and E-64d,  
88 since these calpain inhibitors vary in their specificities targeting different members of the  
89 calpain family [10]. With the exception of calpeptin, none of the inhibitors were cytotoxic  
90 even at the highest concentration tested (**Fig. 2A**). All four calpain inhibitors exhibited  
91 potent inhibition against VSV-SARS-CoV-2 with  $EC_{50}$  values lower than 1.5  $\mu$ M (**Fig. 2B**).

92 Calpain inhibitor III and calpeptin, which are more inhibitory against CAPN2 [10], showed  
93 stronger efficacy than ALLN and E-64d, with EC<sub>50</sub> values of 231 nM and 208 nM,  
94 respectively (**Fig. 2B**). VSV was reported to not be sensitive to E-64d treatment [11].  
95 Consistently, all four calpain inhibitors were substantially less inhibitory against VSV  
96 infection (**Fig. 2C**). For instance, calpain inhibitor III and calpeptin had EC<sub>50</sub> values of  
97 10.67 μM and 7.43 μM, respectively, indicating a more than 30-fold increase when  
98 compared to VSV-SARS-CoV-2 (**Fig. 2C**). In addition to MA104 cells, the antiviral  
99 activities of calpain inhibitor III and calpeptin against VSV-SARS-CoV-2 were confirmed  
100 in Vero E6 cells (**Fig. 2D**). Notably, VSV-SARS-CoV-2 does not encode M<sup>pro</sup>, the key  
101 therapeutic target identified in many previous protease inhibitor studies. Therefore, the  
102 contrasting results of inhibition of VSV-SARS-CoV-2 compared to VSV and the more  
103 pronounced inhibitory effects seen with calpain inhibitor III and calpeptin prompted us to  
104 hypothesize that these calpain inhibitors may play a role in interfering with the activities  
105 of the SARS-CoV-2 spike protein by inhibiting the host gene *CAPN2*.

106

### 107 **VSV-SARS-CoV-2 infection is significantly reduced in *CAPN2* knockout cells**

108 To directly investigate the role of the host gene *CAPN2* in SARS-CoV-2 infection, we  
109 genetically knocked out *CAPN2* by lentivirus-mediated CRISPR/Cas9 in MA104 cells,  
110 which express the endogenous ACE2 receptor that is necessary for virus entry. The  
111 *CAPN2* knockout (KO) efficiency was validated by western blot (**Fig. 3A**). WT and *CAPN2*  
112 KO cells were infected with VSV-SARS-CoV-2 at different multiplicities of infection (MOIs)  
113 and infectivity was determined at different time points post infection. We found that VSV-  
114 SARS-CoV-2 replication, reflected by GFP signals, was highly attenuated in *CAPN2* KO

115 cells under all conditions (**Fig. S2A**). Consistently, intracellular viral mRNA levels were  
116 reduced by approximately 4-fold in the absence of CAPN2 (**Fig. S2B**), suggesting a pro-  
117 viral role of CAPN2 in VSV-SARS-CoV-2 infection. To further corroborate our findings,  
118 we performed standard plaque assays of VSV-SARS-CoV-2 infections at MOIs of 1, 0.1,  
119 0.01, and 0.001 in WT and *CAPN2* KO cells. 10 plaques from each group were selected  
120 and the diameters of plaque sizes were quantified. The plaques of VSV-SARS-CoV-2  
121 formed in the KO cells had an average of diameter of 1 mm, significantly smaller than the  
122 2 mm observed in the WT cells (**Fig. 3B**). To test whether this phenotype was associated  
123 with the spike protein, we performed similar plaque assays using VSV. No significant  
124 difference in sizes of VSV plaques was observed between WT and KO cells (**Fig. 3C**),  
125 suggesting that CAPN2 promotes the replication of VSV-SARS-CoV-2 but not VSV by  
126 acting on the spike protein or facilitating spike protein related functions.

127

### 128 **CAPN2 is required for an early step of the SARS-CoV-2 replication cycle**

129 GFP signals from VSV-SARS-CoV-2 were reduced in *CAPN2* KO cells at 6 hours post  
130 infection (**Fig. S2A**), suggesting that CAPN2 functions to aid viral infection within a single  
131 replication cycle. We next sought to pinpoint the time point when CAPN2 exerts its pro-  
132 viral effect. A time-course experiment was performed by infecting WT and KO cells with  
133 VSV-SARS-CoV-2 and examining intracellular viral RNA levels at 1-6 hours post infection  
134 by RT-qPCR. Our results show that as early as 1 hour post infection, significantly lower  
135 viral mRNA levels were observed in the KO cells than those in the WT cells (**Fig. 4A**).  
136 Similar reduction was seen throughout the course of infection (**Fig. 4A**). A similar trend  
137 was reflected by the SARS-CoV-2 spike protein levels as the nascent protein synthesis

138 was first visible starting at 4 hours post infection in WT cells, whereas it was barely  
139 detectable at 6 hours post infection in *CAPN2* KO cells (**Fig. 4B**).

140

141 Next, we set out to evaluate the early pro-viral role of *CAPN2* in the context of a clinical  
142 isolate of infectious (?) SARS-CoV-2 (2019-nCoV/USA-WA1/2020 strain). Consistent  
143 with our findings with VSV-SARS-CoV-2, WT SARS-CoV-2 infection yielded lower  
144 intracellular viral mRNA levels in *CAPN2* KO cells than WT cells at 6 hours post infection  
145 (**Fig. 4C**). Concurrent SARS-CoV-2 variants accumulate multiple mutations in the spike  
146 protein that result in enhanced transmission and antibody evasion [12]. To that end, we  
147 tested a recombinant SARS-CoV-2 strain with spike mutations in three key residues  
148 E484K, N501Y, and D614G [13]. Interestingly, although the mRNA levels trended lower  
149 in *CAPN2* KO cells, the difference was not statistically significant (**Fig. 4D**), suggesting  
150 that the effect of *CAPN2* on SARS-CoV-2 is potentially dependent on the nature of spike  
151 proteins.

152

### 153 ***CAPN2* promotes SARS-CoV-2 binding to host cells**

154 As suggested by the reduced levels of viral mRNA levels as early as 1 hpi (**Fig. 4A**), we  
155 reasoned that *CAPN2* may play an important role at a very early time point of the SARS-  
156 CoV-2 replication cycle, i.e., virus binding and entry, which spike protein mediates. To  
157 test this hypothesis, we generated single clonal *CAPN2* KO MA104 cells, which were  
158 confirmed by Sanger sequencing (**Fig. S3A**), and took advantage of a classical cold  
159 binding assay [14] using VSV-SARS-CoV-2 to assess whether viral adsorption is  
160 negatively impacted by the lack of *CAPN2*. The assay was performed at 4 °C to allow

161 virus binding to host cells but limit the energy required for virus endocytosis to gain entry  
162 into cells, followed by extensive wash and RT-qPCR analysis. As a positive control, we  
163 included a neutralizing antibody (2B04) that targets spike from the ancestral SARS-CoV-  
164 2 WA1 strain [15], the preincubation of which significantly reduced binding of the virus  
165 (**Fig. 5A**). Importantly, we found that the viral RNA levels from the virions bound to the  
166 KO cells were comparable to those in WT cells in the presence of antibody incubation  
167 and significantly lower than those in the WT cells (**Fig. 5A**). Similar binding defects in the  
168 KO cells were observed with WT SARS-CoV-2 WA1 strain (**Fig. 5B**). Viral binding in the  
169 KO cells were essentially reduced to the background levels similar to the antibody  
170 incubation controls (**Fig. 5B**).

171  
172 To dissect the mechanism underlying reduced viral binding in the absence of CAPN2, we  
173 tested potential spike cleavage by CAPN2 given its role as a protease. We co-transfected  
174 HEK293 cells stably expressing human ACE2 with spike derived from WA1 strain, along  
175 with EGFP (control), CAPN2, transmembrane serine protease 2 (TMPRSS2), or furin, the  
176 major proteases known to cleave spike for efficient entry [16]. The cells lysates were  
177 harvested and the intensities of the full-length spike and its cleaved product S2 fragment  
178 were quantified (**Fig. S4A**). The spike cleavage efficiency was plotted as percentage of  
179 the cleavage product within overall spike protein levels. In this assay, overexpression of  
180 V5-tagged CAPN2 did not lead to significant spike cleavage more than EGFP, the  
181 negative control, when compared to other host proteases such as TMPRSS2 and furin  
182 (**Fig. S4B**).

183



184 Next, we examined the levels of SARS-CoV-2 cellular receptor ACE2 in WT and *CAPN2*  
185 KO cells. Interestingly, although the transcriptional level of ACE2 was slightly but  
186 statistically lower in *CAPN2* KO cells (**Fig. 5C**), this difference was not reflected on the  
187 bulk protein level (**Fig. 5D**). Of note, when we stained for subcellular localization of ACE2  
188 in WT and KO cells, we observed much higher levels of surface ACE2 in WT cells co-  
189 localizing with wheat germ agglutinin (WGA) at the plasma membrane by confocal  
190 microscopy, in contrast to higher levels of intracellular ACE2 seen in the KO cells (**Fig.**  
191 **5E**). Co-localization analysis of ACE2 and WGA, indicated by yellow signals in the inset  
192 images, showed that the surface ACE2 levels were significantly reduced in the *CAPN2*  
193 KO cells (**Fig. 5E and F**). Collectively, these data suggest that *CAPN2* positively regulates  
194 the presence of ACE2 at the cell surface, thus enhancing spike-mediated SARS-CoV-2  
195 binding and viral infectivity.

196

## 197 **DISCUSSION**

198 SARS-CoV-2, like SARS-CoV, employs the spike protein that engages surface ACE2 to  
199 bind to host cells and is primed by TMPRSS2 and TMPRSS4 [17], as well as host cysteine  
200 proteases cathepsins B and L for entry into host cells [18]. Many proteases contribute to  
201 viral entry of SARS-CoV-2 and the development of immunopathology during COVID-19  
202 diseases [17-21]. In this study, we uncovered the host protease *CAPN2* as a novel host  
203 factor that aides the infection of SARS-CoV-2.

204

205 *CAPN2* plays a major role in cancer-related cell proliferation [22, 23]. Although  
206 participation of calpains in virus infections has not been well understood, several

207 published studies indicate pro-viral functions of the host gene CAPN2. CAPN2 expression  
208 was discovered to be an indicator of level of hepatic fibrosis during hepatitis B virus  
209 infection [24]. Additionally, CAPN2 enhances replication of echovirus 1 at a late stage  
210 step during the viral replication cycle [25] and CAPN2 promotes coxsackievirus entry into  
211 host cells [26]. In our study, we utilized the recombinant VSV-SARS-CoV-2 as a surrogate  
212 for SARS-CoV-2 and observed viral inhibition by calpain inhibitors through a series of  
213 experiments using chemical inhibitors, genetic knockouts, and classical virological  
214 approaches. Unlike the literature describing the direct role of CAPN2 in viral entry and  
215 assembly, we show that CAPN2 also promotes SARS-CoV-2 infection by acting early to  
216 aid virus binding (**Fig. 5**). Further studies are needed to understand whether CAPN2  
217 modulates ACE2 endosomal trafficking, recycling, or degradation.

218

219 Our current study has a number of limitations. The calpain inhibitors are not tested in  
220 primary human airway epithelial cells and their therapeutic utility is not yet explored to  
221 inhibit SARS-CoV-2 infection in relevant animal models. Another caveat is the frequency  
222 of mutations in the spike protein in SARS-CoV-2 strains. The relevance of CAPN2 to  
223 SARS-CoV-2 infection seems to be strain-specific (**Fig. 4C and D**), which we do not yet  
224 fully understand. Nonetheless, our findings highlight a novel function of CAPN2 in  
225 mediating SARS-CoV-2 entry and offer an alternative explanation to the protective  
226 efficacy of calpain inhibitors independent of blocking M<sup>pro</sup> activities.

227

## 228 **MATERIALS AND METHODS**

### 229 **Reagents, cells, and viruses**

230 **Reagents:** MG132 (Selleckchem, S2619), gefitinib (Selleckchem, S1025), nigericin  
231 (InvivoGen, tlr-nig/NIG-36-01), brefeldin A (Cell Signaling Technology, 9972S), FTY720  
232 (Santa Cruz Biotechnology, sc-202161A), IBMX, concanamycin A (Enzo Life Sciences,  
233 ALX-380-034-C025), tetrandrine (Selleckchem, S2403), U18666A (Cayman Chemical,  
234 10009085), ETP-46464 (Selleckchem, S8050), JIB-04 (Tocris, 4972), nitazoxanide  
235 (COVID Box, MMV688991), ketoconazole (COVID Box, MMV637533), AG-1478  
236 (Selleckchem, S2728), caffeic acid (Selleckchem, S7414), thapsigargin (Cell Signaling  
237 Technology, 1278S), staurosporine (Cell Signaling Technology, 9953S), arbidol-HCl  
238 (Selleckchem, S2120). Calpain Inhibitor set includes ALLN, calpain inhibitor III, calpeptin,  
239 and E-64d used in the viral inhibition assays (208733-1SET, Sigma-Aldrich).

240

241 **Cells:** MA104 cells (ATCC, CRL-2378.1) were cultured in M199 medium (Thermo  
242 Scientific, 11150067) supplemented with 10% fetal bovine serum (FBS) and 1X Penicillin-  
243 Streptomycin-Glutamine (Thermo Scientific, 10378016). *CAPN2* KO MA104 cells were  
244 cultured in complete M199 medium with the addition of puromycin (10 µg/mL) for selection  
245 (single-guide RNA sequence: TGATCCGCATCCGAAATCCC). Vero E6 cells were  
246 cultured in DMEM (Thermo Scientific, 11965118) supplemented with 10% fetal bovine  
247 serum (FBS) and 1X Penicillin-Streptomycin-Glutamine.

248

249 **Viruses:** Recombinant VSV-eGFP [27] and VSV-eGFP-SARS-CoV-2 were previously  
250 described [8]. WT SARS-CoV-2 clone of the 2019n-CoV/USA\_WA1/2020 (WA1/2020)  
251 strain and SARS-CoV-2 containing three point mutations in the spike gene E484K, N501Y,

252 D614G were obtained from Pei-Yong Shi lab [28, 29], viruses stocks were propagated in  
253 stable clonal Vero-TMPRSS2 obtained from Sean Whelan lab.

254

255

256 **Inhibitor Screen:** Cells were seeded in 96 well plates. When they reached 80~90%  
257 confluency, they were pretreated with indicated compounds at desired concentrations for  
258 1 hour, followed by virus infection for 24 hours with the compound present. The cells were  
259 then washed and placed in clear PBS for Typhoon imager scanning. Co-encoded GFP  
260 serves as an indicator of infection level as the imager detects fluorescent signals. Darker  
261 color corresponds to more intense signals and therefore higher level of infection. The  
262 typhoon images were then processed using ImageJ for quantification of infection level.

263

264 **Cell cytotoxicity assay:** The cytotoxicity level of calpain inhibitors were determined  
265 using the Cell Counting Kit 8 (Abcam, ab228524). Cells in 96-well plates were treated  
266 with inhibitors of interest at concentrations within a range from 0.1 to 300  $\mu$ M at 37°C for  
267 25 hours. Fresh medium containing 10  $\mu$ L of WST-8 substrate were added to each well  
268 to replace the inhibitor-containing medium. After 2 hours incubation at 37°C protected  
269 from the light, absorbance at 460nm was measured by BioTek ELx800 Microplate Reader  
270 and processed by Gen5 software.

271

272 **Plaque Assay:** MA104 cells were plated, grew to confluency in 6-well plates, and were  
273 infected with serial diluted viruses in serum-free M199 medium at 37°C for 1 hour.  
274 Afterwards, virus inoculum was replaced with warm agarose mixed with 2X M199 at 1:1

275 ratio. At 72 hours post infection, GFP signals in the plates were scanned by Amershad  
276 Typhoon 5 (GE) and plaque sizes were quantified by the ECHO microscope [27].

277

278 **RNA extraction and quantitative PCR:** RNA extraction were performed using QIAGEN  
279 RNeasy Mini kit (QIAGEN, 74104) per manufacturer's instructions. For WT SARS-CoV-2  
280 and triple variant E484K, N501Y, D614G infections, viral RNA was extracted using TRIzol  
281 (Invitrogen, 15596018) and chloroform following the product protocol. Viral mRNA levels  
282 (VSV N forward primer: 5'- GATAGTACCGGAGGATTGACGACTA-3', VSV-N reverse  
283 primer: 5'-TCAAACCATCCGAGCCATTC-3', SARS-CoV-2 N primer 1: 5'-  
284 ATGCTGCAATCGTGCTACAA-3', primer 2: 5'-GACTGCCGCCTCTGCTC-3', probe: 5'-  
285 /FAM/TCAAGGAACAACATTGCCAA/TAMRA/-3') were examined by real-time RT-PCR  
286 using High Capacity cDNA Reverse Transcription kit (Applied Biosystems, 4368813) and  
287 AriaMX (Agilent) with 12.5 µl of either SYBR Green master mix (Applied Biosystems,  
288 4367659) or Taqman master mix (Applied Biosystems, 4444557), reaching a total  
289 reaction volume of 25 µl. Expression of each gene was normalized to the expression of  
290 housekeeping gene GAPDH as previously described [30].

291

292 **Western Blot:** Cells were washed with PBS and lysed by RIPA buffer (Thermo Scientific,  
293 89901) supplemented with 100X protease inhibitor cocktail and phosphatase inhibitor  
294 (Thermo Scientific, 78420), followed by a 10-minute incubation on ice. Cell lysates were  
295 then subjected to centrifugation at 13,500 RPM for 10 minutes at 4°C to remove cell debris  
296 and chromatids. The protein samples were then boiled in 2X Laemmli Sample Buffer (Bio-  
297 Rad, #1610737EDU) containing 5% β-mercaptoethanol at 95 °C for 5 minutes. Prepared

298 samples were run in 4-12% gels and transferred onto nitrocellulose membranes.  
299 Membranes were blocked in 5% BSA in TBS + 0.1% Tween-20 (TBST) at room  
300 temperature before incubation at 4°C overnight with primary antibodies: SARS-CoV-2  
301 spike RBD (Sino Biological, 40592-T62), GAPDH (BioLegend, 631402), calpain-2 (Cell  
302 Signaling Technology, 2539), ACE2 (R&D Systems, MAB933), S2 (Sino Biological,  
303 40590-T62), and V5 (Cell Signaling Technology, 13202S). Membranes were then washed  
304 three times with TBST and incubated in secondary antibodies accordingly: anti-mouse  
305 HRP-linked IgG (Cell Signaling Technology, 7076S) or anti-rabbit HRP-linked IgG  
306 (Invitrogen, A27036) diluted in 5% BSA in TBST at room temperature for 1 hour. After the  
307 secondary antibody incubation, the membranes were washed three times with TBST and  
308 visualized by using Chemi-Doc imaging system (Bio-Rad).

309

310 **Confocal microscopy:** MA104 cells were seeded in eight-well chamber slides (catalog  
311 info here) and were fixed when reached 80% confluency in 4% paraformaldehyde for 10  
312 min at room temperature. Cells were then washed with PBS once and stained with WGA  
313 (Thermo Scientific, W11262) for 10 minutes at room temperature. After another wash with  
314 PBS, cells were incubated with anti-ACE2 (Sino Biological, 10108-RP01-100) or isotype  
315 control (Cell Signaling Technology, 7074S) at room temperature for one hour. Stained  
316 cells were then washed with PBS once and then incubated with the secondary antibody  
317 (Invitrogen, A-11008) in dark for another hour. Postsecondary antibody incubation, the  
318 cells were washed and stained with DAPI (Invitrogen, P36962). The imaging was  
319 performed by a Zeiss LSM880 Confocal Microscope at the Molecular Microbiology

320 imaging core facility at Washington University in St. Louis. Images were analyzed by  
321 Velocity v6.3 to generate co-localization and calculate the Pearson correlation coefficients.

322

323 **Cold binding assay:** Cells were seeded in 24-well plates and were ready for use when  
324 reached 60%~80% confluency. Plates were pre-chilled on ice for 2~4 hours prior to  
325 incubation with VSV-SARS-CoV-2 or SARS-CoV-2. An MOI of 20 was used to ensure  
326 maximum viral adsorption. Viruses, mixture of virus with 2B04, a neutralizing antibody  
327 against SARS-CoV-2 [15] were incubated at 37 °C for 1 hour. Pre-incubated virus, mixture  
328 of virus and antibody were chilled on ice for 30 minutes before added onto pre-chilled  
329 cells and incubated on ice. At 1 hour post incubation, the cells were washed with pre-  
330 chilled PBS three times and then lysed with RLT buffer for RNA harvesting.

331

332 **Statistical analysis:** Bar graphs are displayed as means  $\pm$  SEM. Statistical tests were  
333 performed using GraphPad Prism 9.3.1. For **Figures 3B, 3C, 4A, 4C, 4D, 5C, and 5F**,  
334 statistical significance was calculated by Mann Whitney U test. For **Figure 5A and 5B**,  
335 statistical significance was calculated by two-way ANOVA Šidák's multiple comparisons  
336 test. For **Supplemental Figure 4B**, statistical significance was calculated by one-way  
337 ANOVA Dunnett's multiple comparisons test. For inhibition and cytotoxicity curves,  $EC_{50}$   
338 and  $CC_{50}$  values in **Figures 1, 2 and Supplemental Figure 1** were calculated using  
339 nonlinear regression (curve fit). Asterisks indicate the following: \* $P \leq 0.05$ , \*\* $P \leq 0.01$ , and  
340 \*\*\* $P \leq 0.001$ .

341

342 **Funding**

343 This work is financially supported by Washington University DDRCC (NIDDK P30  
344 DK052574) and T32 fellowship (DK007130) (AA) and NIH R01 grant AI167285 (SD).

345

## 346 **Acknowledgement**

347 We appreciate the helpful discussion of our studies with Dr. Haitao Guo (University of  
348 Pittsburgh), Dr. Jun Wang (Rutgers University), and Dr. Fumihiko Urano (Washington  
349 University in St. Louis).

350

## 351 **FIGURE LEGENDS**

352

### 353 **Fig. 1. Small-molecule compounds inhibit VSV and VSV-SARS-CoV-2 infection**

354 Screening of 18 compounds over a 24-hour infection period . MA104 cells were  
355 pre-treated with each compound for 1 hour at indicated concentrations ranging  
356 from 0.01  $\mu\text{M}$  to 30  $\mu\text{M}$  and then infected for 24 hours with either recombinant VSV-  
357 SARS-CoV-2 (MOI=1) or VSV (MOI=1). Quantified GFP signals are plotted as  
358 percentage of inhibition corresponding to dosage.  $\text{EC}_{50}$  values for each curve are  
359 indicated in blue (VSV-SARS-CoV-2) or red (VSV).

360

### 361 **Fig. 2. Calpain inhibitors potently inhibit VSV-SARS-CoV-2 infection**

362 (A) Cytotoxicity assay of calpain inhibitors. MA104 cells were treated with ALLN,  
363 calpain inhibitor III, calpeptin, and E-64d for 25 hours and tested for cell viability.  
364 Percent cytotoxicity was plotted corresponding to dosage.  $\text{CC}_{50}$  values are as  
365 indicated.



366 (B) MA104 cells were pretreated with ALLN, calpain inhibitor III, calpeptin, and E-  
367 64d at concentrations ranging from 0.01  $\mu$ M to 30  $\mu$ M for 1 hour prior to a 24-  
368 hour infection by VSV-SARS-CoV-2 (MOI=1). GFP signals were quantified and  
369 plotted as percentage of inhibition corresponding to dosage. EC50s values are  
370 as indicated.

371 (C) Same as (B) except that VSV was used for infection instead of VSV-SARS-  
372 CoV-2.

373 (D) Same as (B) except that Vero E6 cells were used instead of MA104 cells.

374

### 375 **Fig. 3. CAPN2 KO cells have reduced VSV-SARS-CoV-2 infection**

376 (A) Cell lysates of WT and *CAPN2* KO MA104 cells were harvested and the protein  
377 levels of CAPN2 and GAPDH were measured by western blot.

378 (B) Plaque assays of VSV-SARS-CoV-2 were performed in MA104 cells. Images  
379 were taken at 72 hpi when clear-shaped plaques were observed. 10 plaques  
380 from each sample were selected and measured using microscopy.

381 (C) Same as (B) except VSV was used instead and images were taken at 48 hpi.

382

### 383 **Fig. 4. CAPN2 deletion reduces SARS-CoV-2 infection**

384 (A) Viral mRNA production at early time points post infection by VSV-SARS-CoV-  
385 2 (MOI=1) in WT and *CAPN2* KO MA104 cells. Cells were harvested at 0, 1, 2,  
386 3, 4, 5, 6 hours post infection for RNA extraction followed by RT-qPCR analysis.  
387 Viral mRNA levels are shown relative to those of GAPDH.

388 (B) Same as (A) except that SARS-CoV-2 full-length spike levels were measured  
389 by western blot instead.

390 (C) Viral mRNA levels at 6 hours post infection by SARS-CoV-2 WA1 strain  
391 (MOI=0.1). Infected cells were measured for SARS-CoV-2 viral mRNA levels  
392 by qRT-PCR relative to those of GAPDH.

393 (D) Same as (C) except a SARS-CoV-2 triple spike mutant strain was used instead.

394

395 **Fig. 5. CAPN2 enhances ACE2 surface levels and spike-mediated virus attachment**

396 (A) Cold binding assay with VSV-SARS-CoV-2. WT and *CAPN2* KO MA104 cells  
397 were infected by VSV-SARS-CoV-2 alone (MOI=20) or virus pre-incubated with  
398 a spike-targeted neutralizing antibody 2B04 (10 µg/mL) for 1 hour on ice  
399 followed by RNA extraction and RT-qPCR. Viral mRNA levels were measured  
400 and normalized to those of GAPDH.

401 (B) Same as (A) except that SARS-CoV-2 strain WA1 was used instead.

402 (C) ACE2 mRNA levels of WT and *CAPN2* KO cells. WT and *CAPN2* KO MA104  
403 cells were harvested for RNA extraction followed by RT-qPCR analysis. The  
404 mRNA levels of ACE2 were measured and normalized to those of GAPDH.

405 (D) Bulk ACE2 protein levels in WT and *CAPN2* KO cells. WT and *CAPN2* KO  
406 MA104 cells were harvested for western blot examining the levels of ACE2 and  
407 GAPDH.

408 (E) Confocal analysis of surface levels of ACE2 in WT and *CAPN2* KO cells. WT  
409 and *CAPN2* KO MA104 cells were fixed and stained for surface glycoprotein  
410 (red, WGA), ACE2 (green), and nucleus (blue, DAPI). Scale bars: 13 µm.

411 (F) Quantification of co-localization of ACE2 and WGA-stained cell membrane  
412 glycoprotein in WT and *CAPN2* KO MA104 cells.

413

414 **Supplemental Figure 1. Nitazoxanide effectively inhibits SARS-CoV-2 infection**

415 (A) Inhibition and cytotoxicity of nitazoxanide (NTZ) against SARS-CoV-2-  
416 mNeonGreen infection. Vero E6 cells were treated with NTZ for 1 h prior to  
417 SARS-CoV-2-mNeonGreen infection at an MOI of 0.5. Infection level at 24 hpi  
418 was quantified based on immunofluorescence. For cytotoxicity measurement,  
419 cells were treated with NTZ at 0.1  $\mu$ M to 1000  $\mu$ M for 25 h before being subjected  
420 to WST-8 assay to test cell viability. Percentage cell cytotoxicity was plotted as a  
421 function of compound dosage. Both assays were repeated three times.  $EC_{50}$ ,  
422  $CC_{50}$  and the SI (selectivity index) are as indicated.

423 (B) Same as (A) except VSV-SARS-CoV-2 and MA104 cells were used instead.

424 (C) Drug combination dose-response matrix and VSV-SARS-CoV-2 replication.

425 MA104 cells were treated with NTZ along with JIB-04 at indicated concentrations  
426 for 1 h prior to infection by VSV-SARS-CoV-2 at an MOI of 3. GFP signals at 24  
427 hpi were quantified to calculate the percentage of inhibition. Percent inhibition  
428 was plotted corresponding to color intensity.

429

430 **Supplemental Figure 2. VSV-SARS-CoV-2 infection is reduced in *CAPN2* KO cells.**

431 (A) GFP scans of WT and *CAPN2* KO MA104 cells infected by VSV-SARS-CoV-2 at  
432 indicated MOIs from 0.001 to 1, scanned at 6 to 48 hours post infection. The  
433 black dots represent GFP signals corresponding to infection levels.

434 (B) Viral mRNA levels in WT and *CAPN2* KO cells upon infection of VSV-SARS-  
435 CoV-2 at MOIs of 0.01 and 0.001, harvested at 24 and 48 hpi, respectively. The  
436 experiment was repeated twice.

437

438 **Supplemental Figure 3. A single clone of *CAPN2* KO MA104 cells was validated by**  
439 **Sanger sequencing**

440 sgRNA-targeted exon 7 of the *CAPN2* gene locus in WT (ref) and generated  
441 single clone *CAPN2* KO (seq) by Sanger sequencing. Conserved and mutated  
442 regions were analyzed by CRISPR ID (<http://crispid.gbiomed.kuleuven.be/>).

443

444 **Supplemental Figure 4. WA1 spike is not cleaved significantly by *CAPN2***

445 (A) WA1 spike cleavage by *CAPN2*, *TMPRSS2*, and furin shown by western blotting.  
446 HEK293 cells were co-transfected with 0.5 µg of WA1 spike with 0.5 µg of EGFP,  
447 *CAPN2*, *TMPRSS2*, and furin, respectively. Protein samples were harvested at 24  
448 hours post transfection. The result is representative of four repeats.

449 (B) WA1 spike cleavage quantification from 4 repeated experiments described above.  
450 Intensities of bands of full-length spike and cleaved product S2 were quantified  
451 using ImageJ.

452

453

454

455

## 456 References

- 457
- 458 1. V'Kovski, P., et al., *Coronavirus biology and replication: implications for SARS-CoV-2*.  
459 Nat Rev Microbiol, 2021. **19**(3): p. 155-170.
  - 460 2. Liang, C., et al., *A promising antiviral candidate drug for the COVID-19 pandemic: A*  
461 *mini-review of remdesivir*. Eur J Med Chem, 2020. **201**: p. 112527.
  - 462 3. Owen, D.R., et al., *An oral SARS-CoV-2 M<sup>pro</sup> inhibitor clinical candidate*  
463 *for the treatment of COVID-19*. Science, 2021. **374**(6575): p. 1586-1593.
  - 464 4. Ma, C., et al., *Boceprevir, GC-376, and calpain inhibitors II, XII inhibit SARS-CoV-2*  
465 *viral replication by targeting the viral main protease*. Cell Res, 2020. **30**(8): p. 678-692.
  - 466 5. Son, J., et al., *JIB-04 Has Broad-Spectrum Antiviral Activity and Inhibits SARS-CoV-2*  
467 *Replication and Coronavirus Pathogenesis*. mBio, 2022. **13**(1): p. e03377-21.
  - 468 6. Schneider, M., et al., *Severe acute respiratory syndrome coronavirus replication is*  
469 *severely impaired by MG132 due to proteasome-independent inhibition of M-calpain*. J  
470 Virol, 2012. **86**(18): p. 10112-22.
  - 471 7. Lin, Y., et al., *Xanthohumol Is a Potent Pan-Inhibitor of Coronaviruses Targeting Main*  
472 *Protease*. Int J Mol Sci, 2021. **22**(22).
  - 473 8. Case, J.B., et al., *Neutralizing Antibody and Soluble ACE2 Inhibition of a Replication-*  
474 *Competent VSV-SARS-CoV-2 and a Clinical Isolate of SARS-CoV-2*. Cell Host Microbe,  
475 2020. **28**(3): p. 475-485 e5.
  - 476 9. Driouich, J.S., et al., *Pre-clinical evaluation of antiviral activity of nitazoxanide against*  
477 *SARS-CoV-2*. EBioMedicine, 2022. **82**: p. 104148.
  - 478 10. Ono, Y., T.C. Saïdo, and H. Sorimachi, *Calpain research for drug discovery: challenges*  
479 *and potential*. Nat Rev Drug Discov, 2016. **15**(12): p. 854-876.
  - 480 11. Park, S.B., et al., *Targeting the Fusion Process of SARS-CoV-2 Infection by Small*  
481 *Molecule Inhibitors*. mBio, 2022. **13**(1): p. e0323821.
  - 482 12. Forchette, L., W. Sebastian, and T. Liu, *A Comprehensive Review of COVID-19 Virology,*  
483 *Vaccines, Variants, and Therapeutics*. Current Medical Science, 2021. **41**(6): p. 1037-  
484 1051.
  - 485 13. Puray-Chavez, M., et al., *Systematic analysis of SARS-CoV-2 infection of an ACE2-*  
486 *negative human airway cell*. Cell Rep, 2021. **36**(2): p. 109364.
  - 487 14. Li, B., et al., *Drebrin restricts rotavirus entry by inhibiting dynamin-mediated*  
488 *endocytosis*. Proceedings of the National Academy of Sciences, 2017. **114**(18): p. E3642-  
489 E3651.
  - 490 15. Alsoussi, W.B., et al., *A Potently Neutralizing Antibody Protects Mice against SARS-*  
491 *CoV-2 Infection*. J Immunol, 2020. **205**(4): p. 915-922.
  - 492 16. Hoffmann, M., H. Kleine-Weber, and S. Pöhlmann, *A Multibasic Cleavage Site in the*  
493 *Spike Protein of SARS-CoV-2 Is Essential for Infection of Human Lung Cells*. Mol Cell,  
494 2020. **78**(4): p. 779-784.e5.
  - 495 17. Zang, R., et al., *TMPRSS2 and TMPRSS4 promote SARS-CoV-2 infection of human small*  
496 *intestinal enterocytes*. Science Immunology, 2020. **5**(47): p. eabc3582.
  - 497 18. Hoffmann, M., et al., *SARS-CoV-2 Cell Entry Depends on ACE2 and TMPRSS2 and Is*  
498 *Blocked by a Clinically Proven Protease Inhibitor*. Cell, 2020. **181**(2): p. 271-280 e8.
  - 499 19. Sacco, M.D., et al., *Structure and inhibition of the SARS-CoV-2 main protease reveal*  
500 *strategy for developing dual inhibitors against M<sup>pro</sup> and cathepsin L*.  
501 Science Advances, 2020. **6**(50): p. eabe0751.

- 502 20. Fu, L., et al., *Both Boceprevir and GC376 efficaciously inhibit SARS-CoV-2 by targeting*  
503 *its main protease*. Nat Commun, 2020. **11**(1): p. 4417.
- 504 21. Zhao, M.M., et al., *Cathepsin L plays a key role in SARS-CoV-2 infection in humans and*  
505 *humanized mice and is a promising target for new drug development*. Signal Transduct  
506 Target Ther, 2021. **6**(1): p. 134.
- 507 22. Li, P., et al., *Silencing CAPN2 Expression Inhibited Castration-Resistant Prostate*  
508 *Cancer Cells Proliferation and Invasion via AKT/mTOR Signal Pathway*. BioMed  
509 Research International, 2017. **2017**: p. 2593674.
- 510 23. Miao, C., et al., *Overexpression of CAPN2 promotes cell metastasis and proliferation via*  
511 *AKT/mTOR signaling in renal cell carcinoma*. Oncotarget; Vol 8, No 58, 2017.
- 512 24. Feng, R., et al., *CAPN2 acts as an indicator of hepatitis B virus to induce hepatic*  
513 *fibrosis*. Journal of Cellular Biochemistry, 2020. **121**(3): p. 2428-2436.
- 514 25. Upla, P., et al., *Calpain 1 and 2 Are Required for RNA Replication of Echovirus 1*.  
515 Journal of Virology, 2008. **82**(3): p. 1581-1590.
- 516 26. Bozym, R.A., et al., *Release of Intracellular Calcium Stores Facilitates Coxsackievirus*  
517 *Entry into Polarized Endothelial Cells*. PLOS Pathogens, 2010. **6**(10): p. e1001135.
- 518 27. Zang, R., et al., *Cholesterol 25-hydroxylase suppresses SARS-CoV-2 replication by*  
519 *blocking membrane fusion*. Proc Natl Acad Sci U S A, 2020. **117**(50): p. 32105-32113.
- 520 28. Plante, J.A., et al., *Spike mutation D614G alters SARS-CoV-2 fitness*. Nature, 2021.  
521 **592**(7852): p. 116-121.
- 522 29. Xie, X., et al., *An Infectious cDNA Clone of SARS-CoV-2*. Cell Host Microbe, 2020.  
523 **27**(5): p. 841-848.e3.
- 524 30. Ding, S., et al., *Comparative Proteomics Reveals Strain-Specific  $\beta$ -TrCP Degradation via*  
525 *Rotavirus NSP1 Hijacking a Host Cullin-3-Rbx1 Complex*. PLoS Pathog, 2016. **12**(10): p.  
526 e1005929.  
527  
528

# Figure 1

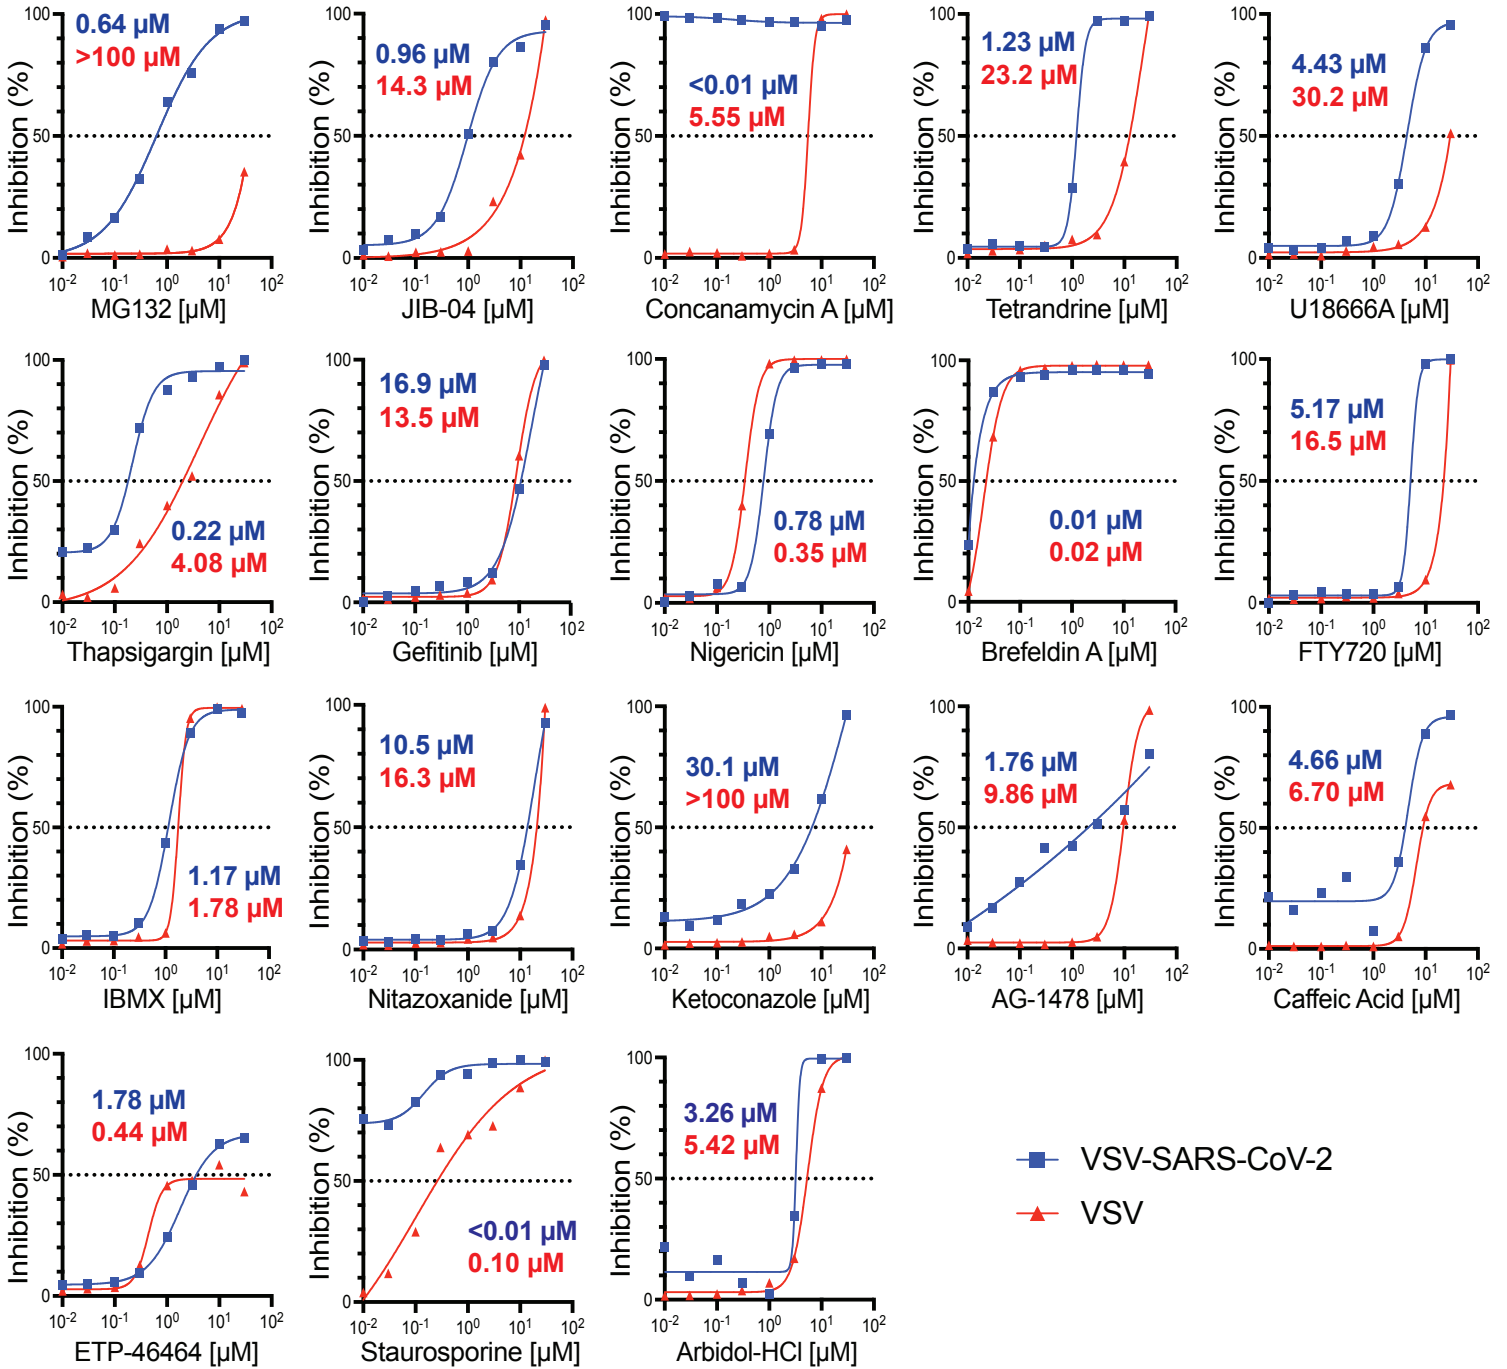

## Figure 2

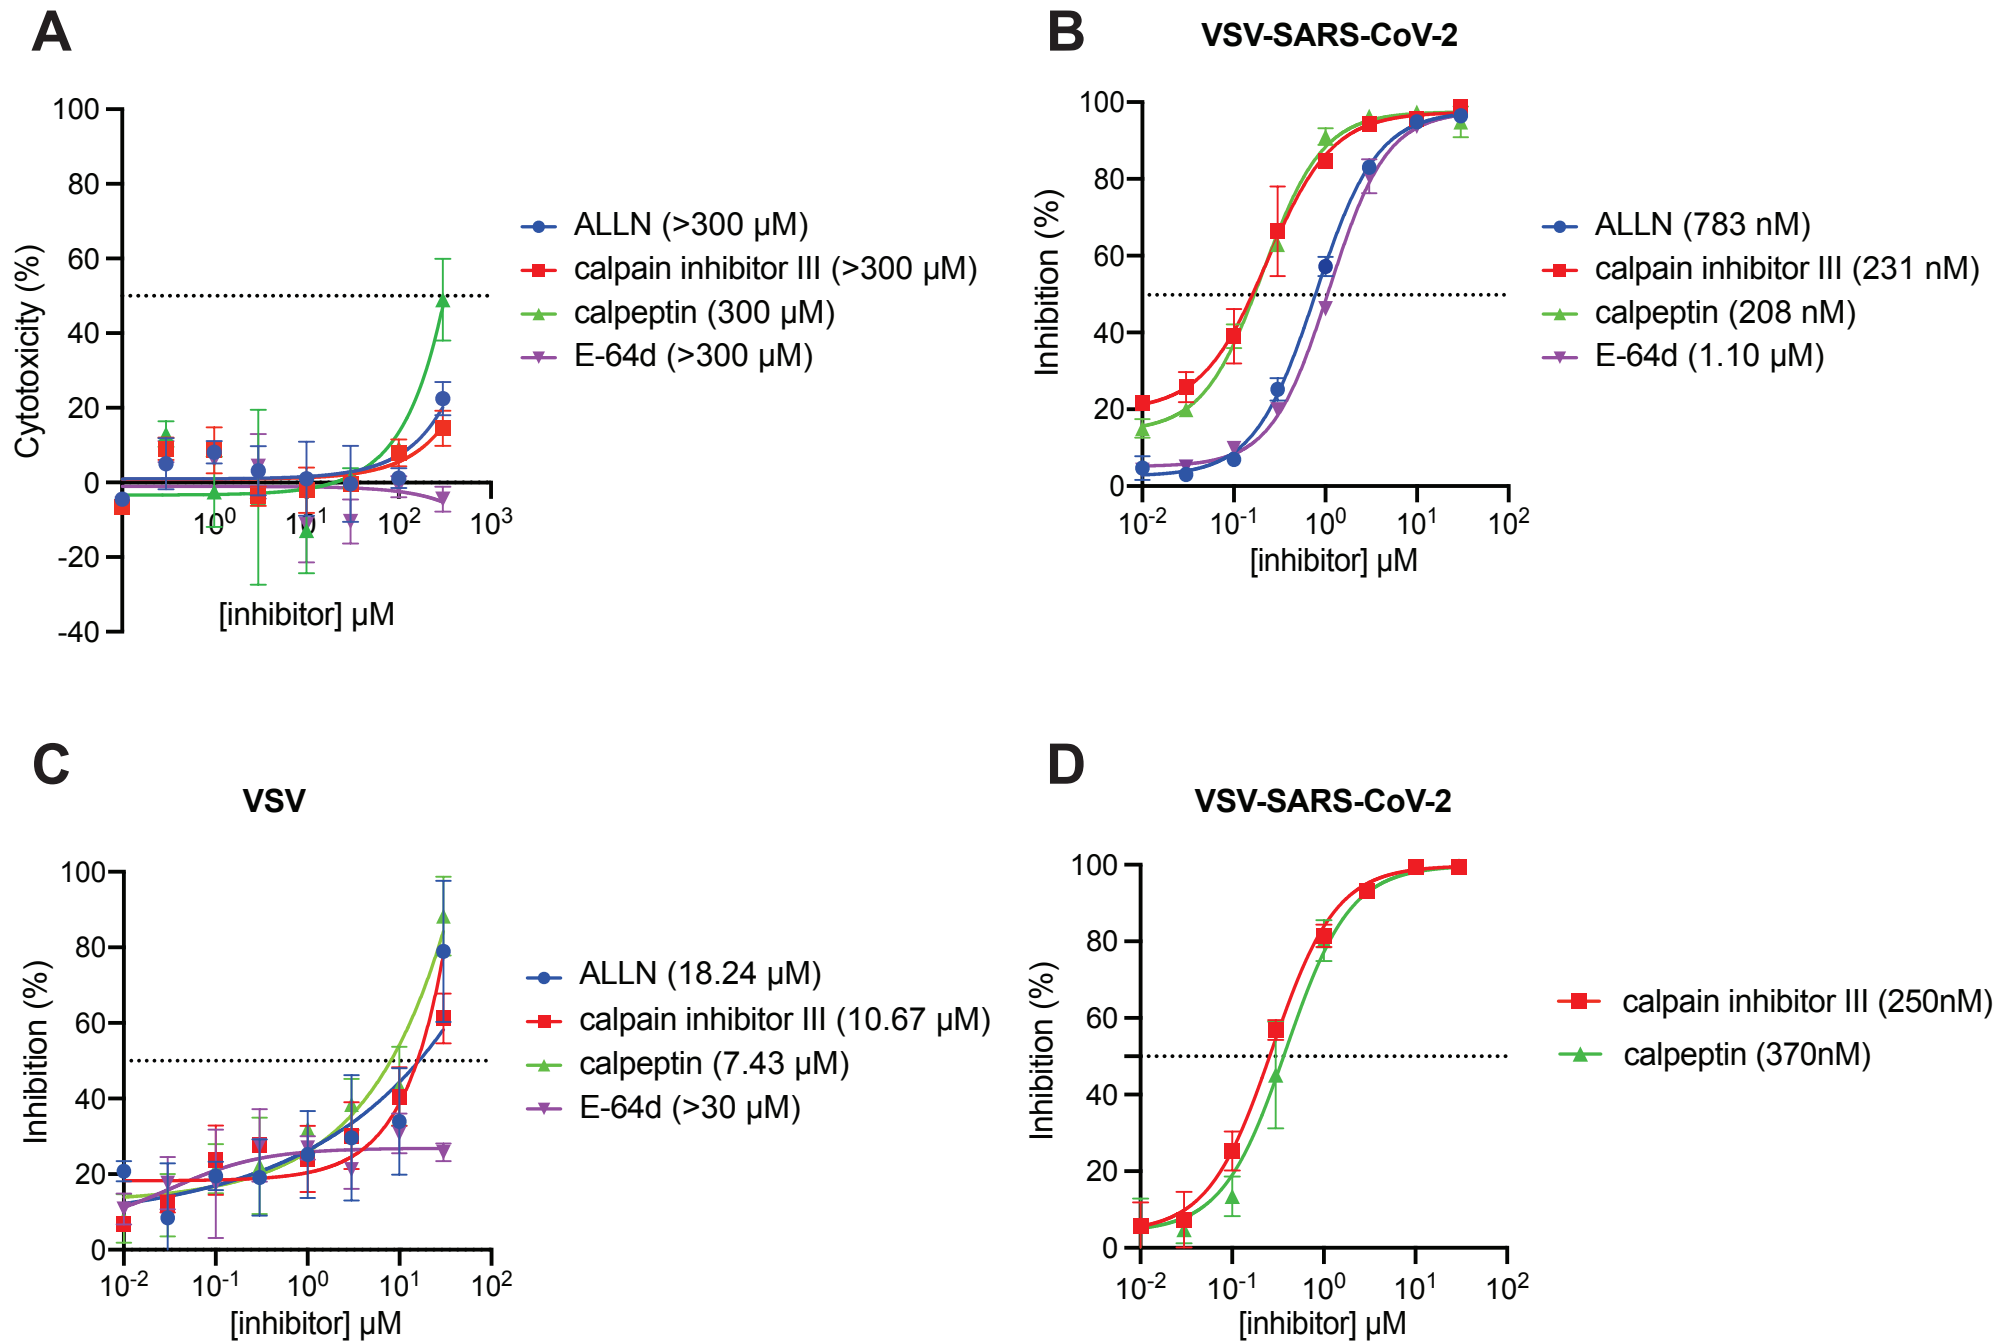



## Figure 3

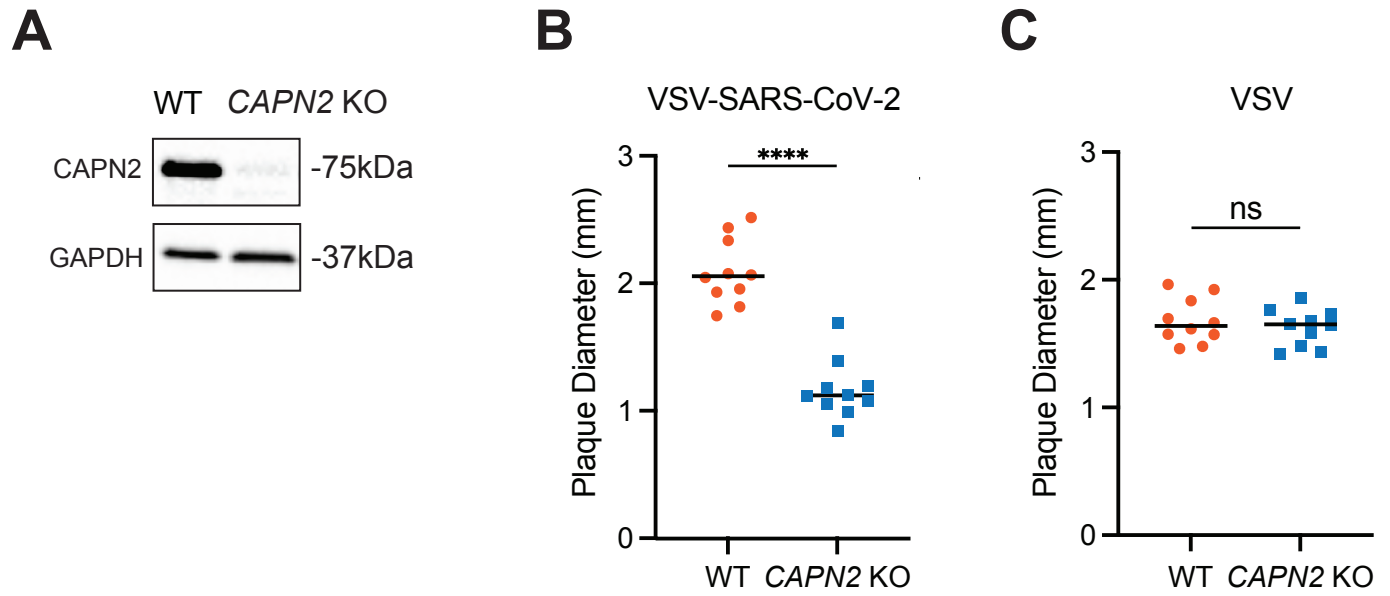

# Figure 4

**A**

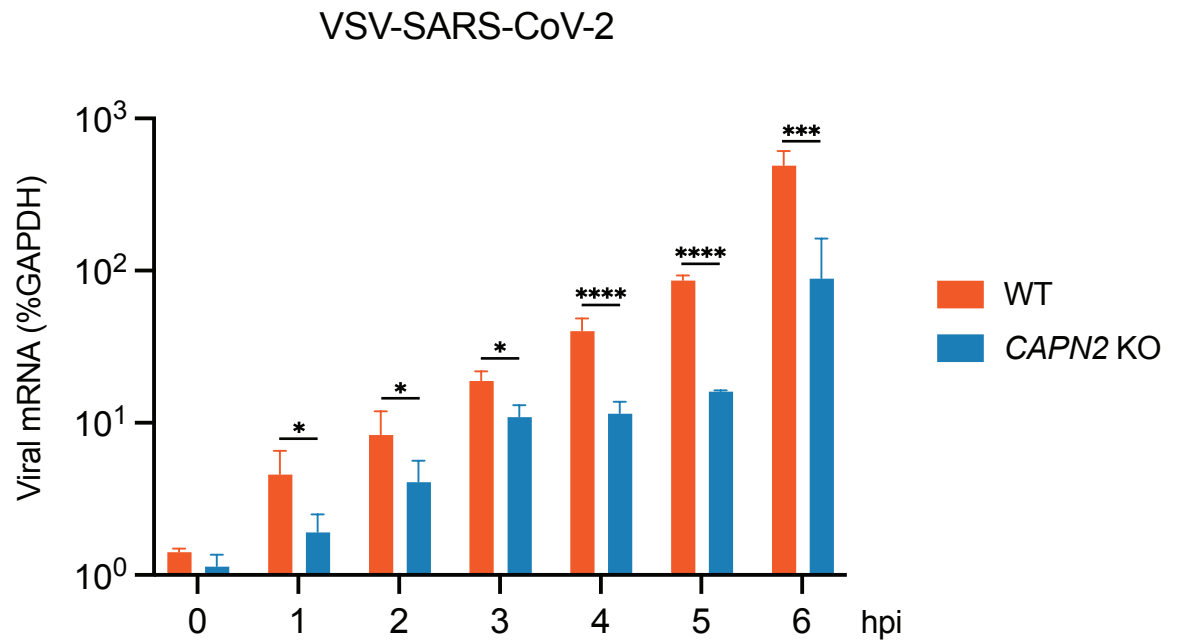

**B**

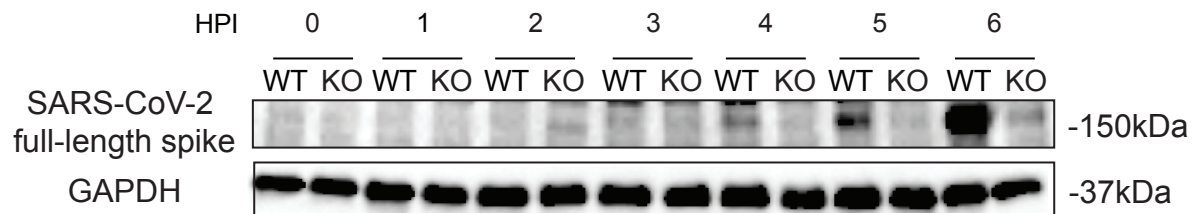

**C**

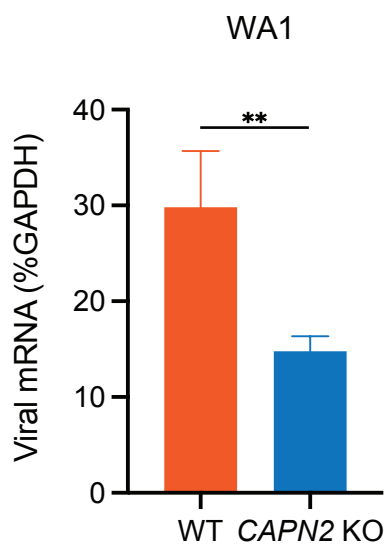

**D**

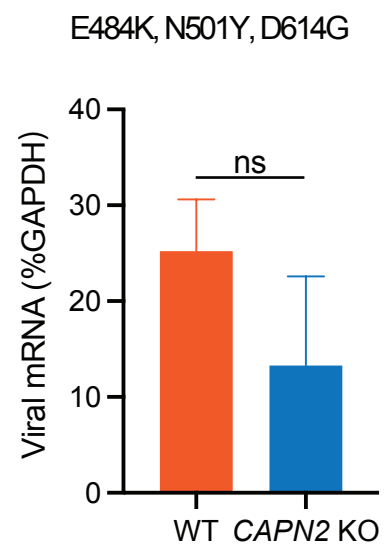

# Figure 5

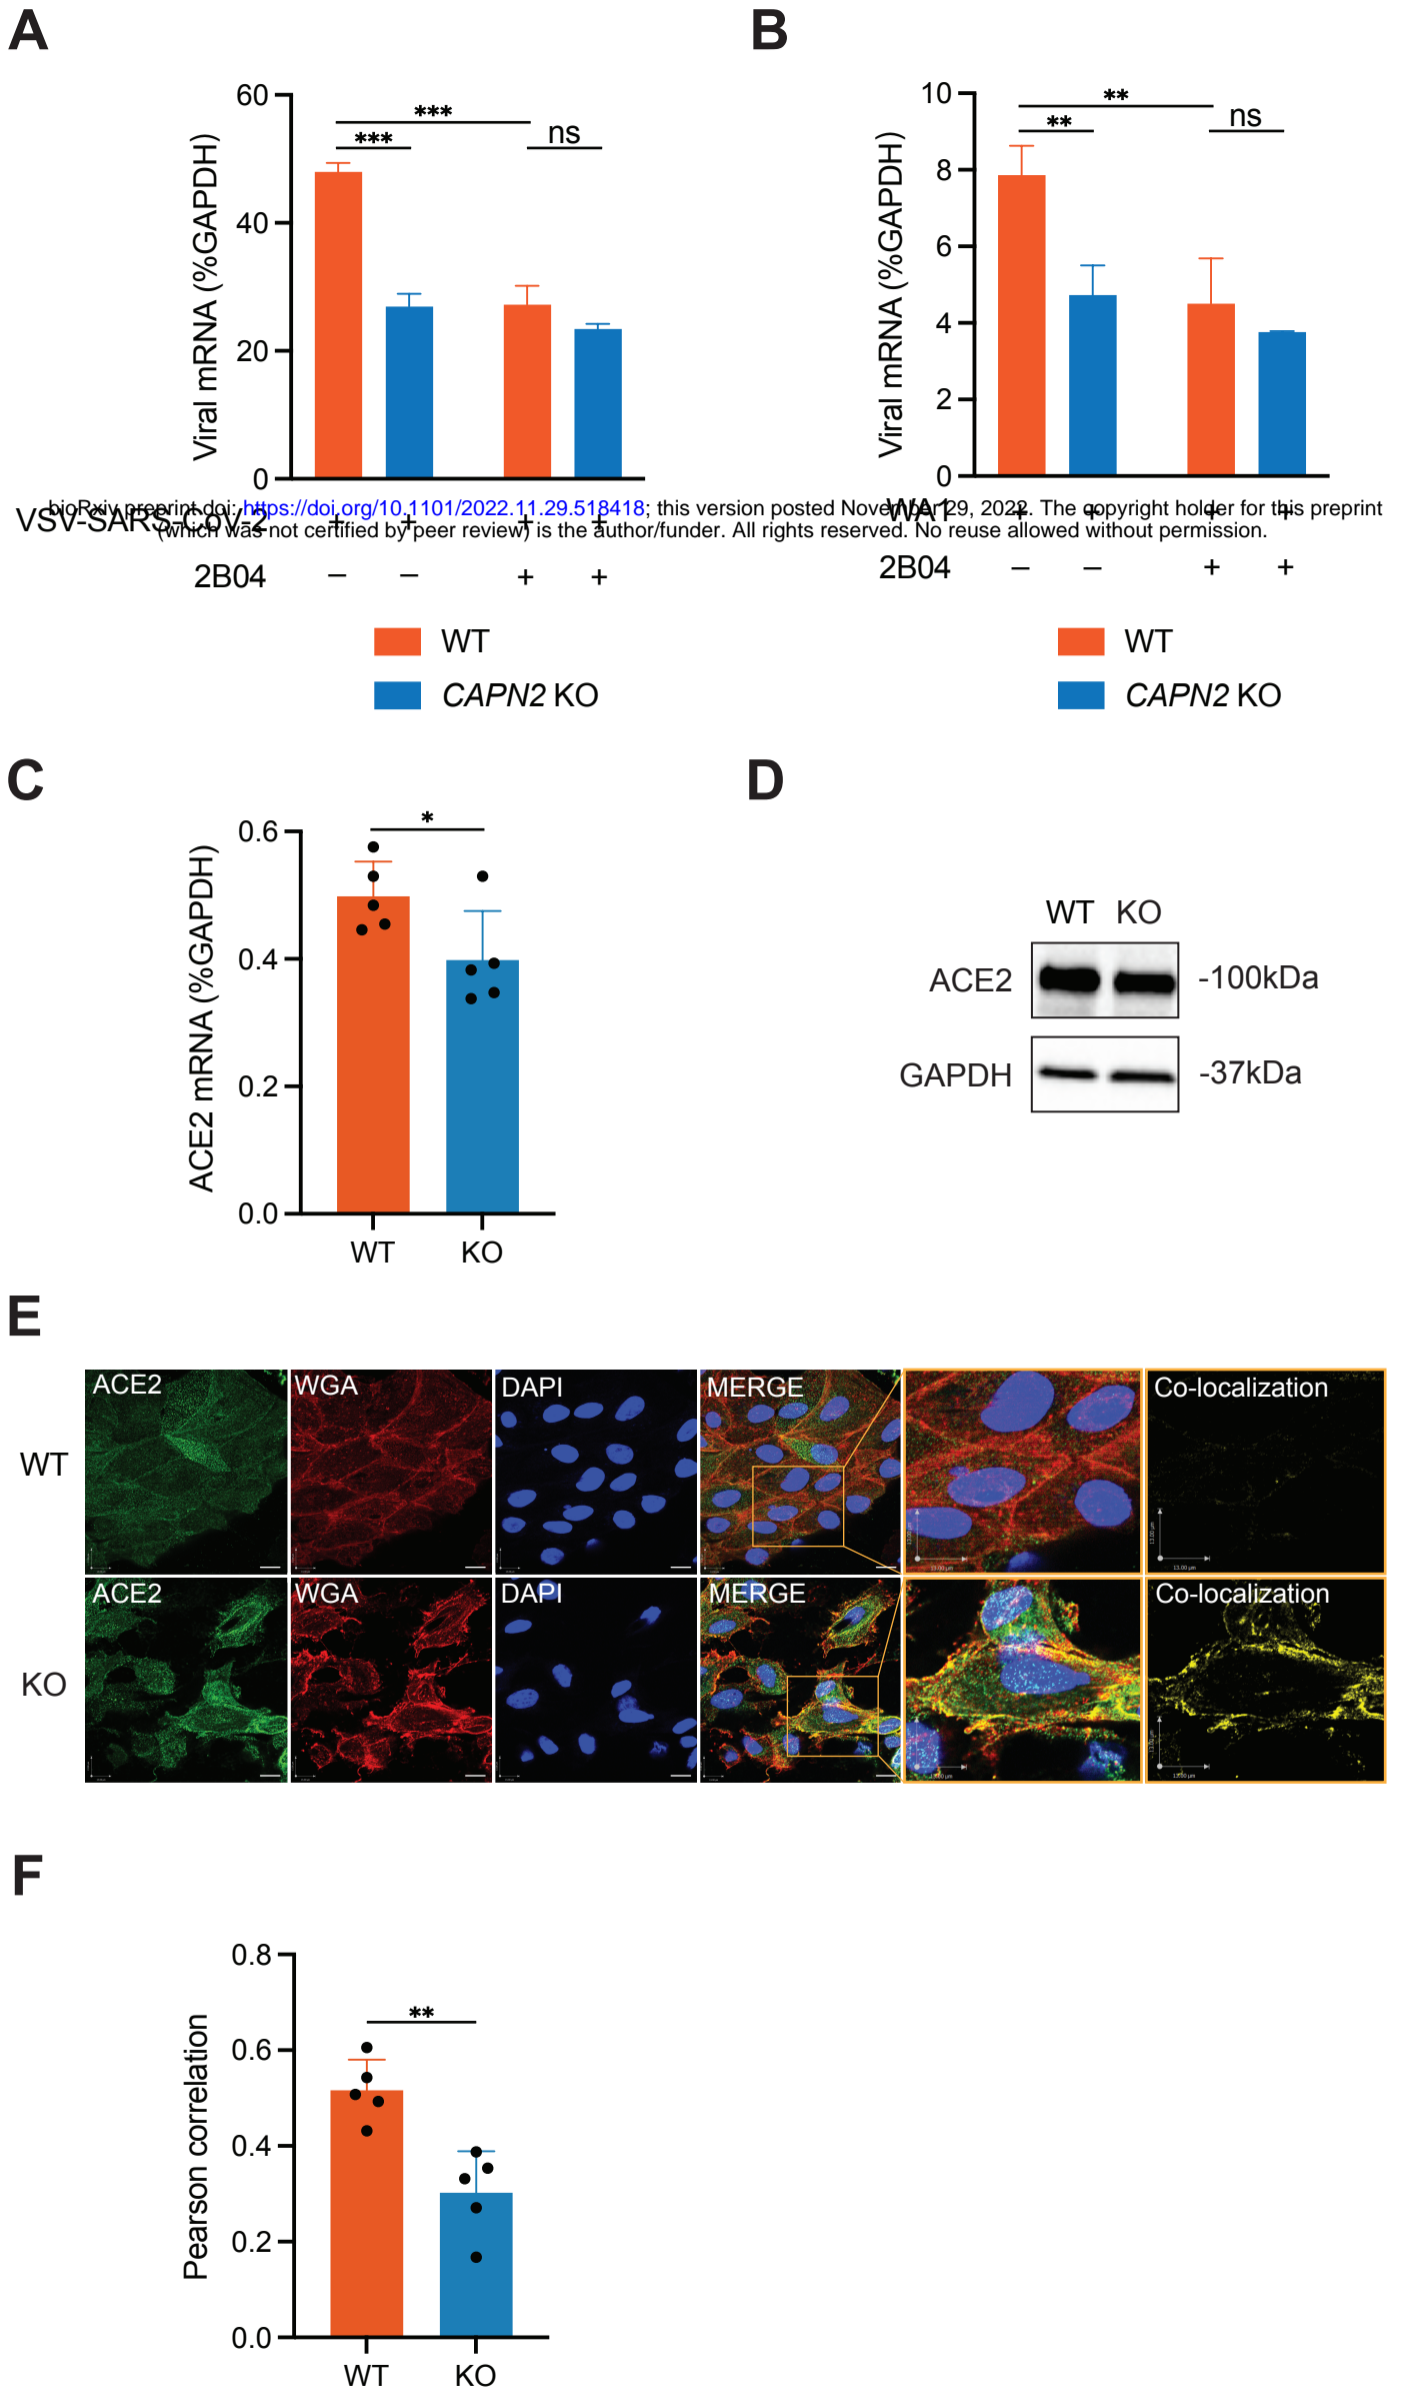

Source: https://www.biorxiv.org/content/10.1101/2022.11.29.518418v1.full.pdf
